# Supplementary material
Source: publisher figshare collection journal article supplement (https://acs.figshare.com/ndownloader/files/3614262)
Supplement: Supplementary file 1 [file 3614262]

## **Supplementary Material for**

### **Stability analysis of glutamic acid linked peptides coupled to NOTA through different chemical linkages**

Lixin Lang, Ying Ma, Dale O. Kiesewetter and Xiaoyuan Chen\*

Laboratory of Molecular Imaging and Nanomedicine (LOMIN), National Institute of Biomedical Imaging and Bioengineering (NIBIB), National Institutes of Health (NIH), Bethesda, MD 20892-2281, USA

\* Correspondence: [shawn.chen@nih.gov](mailto:shawn.chen@nih.gov)

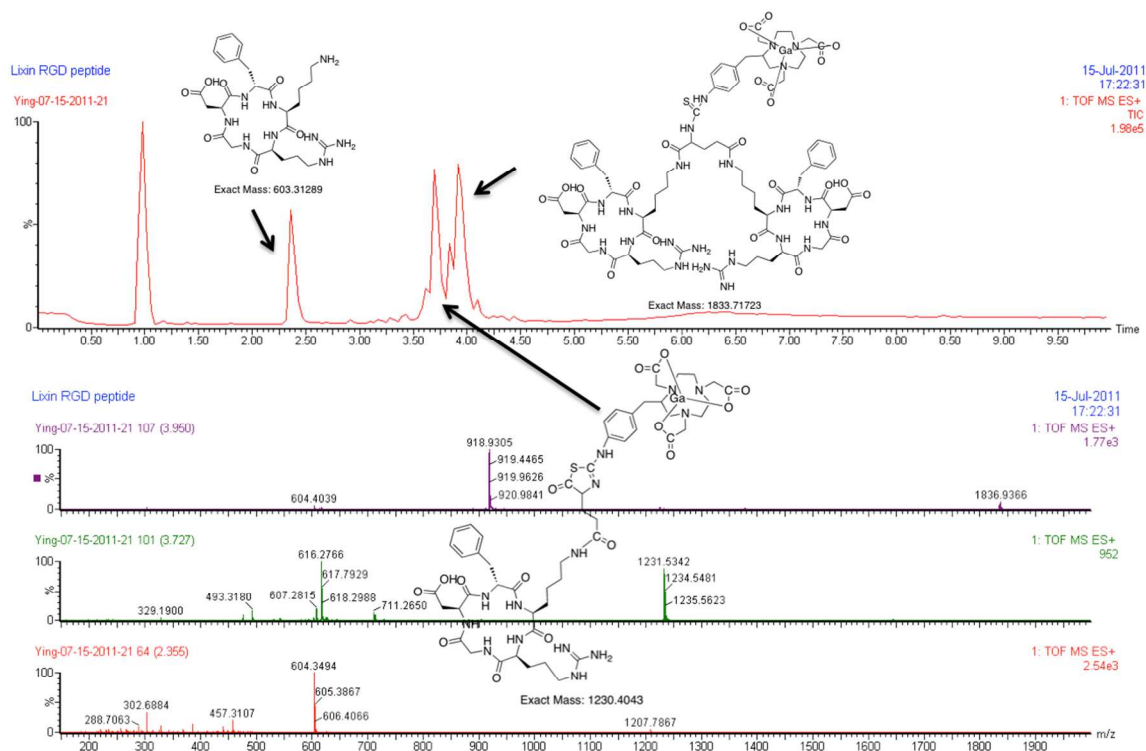

Figure S1. LC-MS analysis of Possible side products of Ga-NOTA-Bn-NCS-E[c(RGDfK)]<sub>2</sub> (15) hydrolysis. The peak at 3.95 min with the mass of 1836.9366 is the parent compound Ga-NOTA-Bn-NCS-E[c(RGDfK)]<sub>2</sub> (15). The peak at 3.73 min with the mass of 1231.5342 is the parent compound minus a c(RGDfK) monomer and a water molecule (compound 16). The peak at 2.35 min is c(RGDfK) monomer (5).
